# Supplementary material for: Effectiveness of incentives and follow-up on increasing survey response rates and participation in field studies
Source: BMC Med Res Methodol. 2019 Dec 5;19:230. doi: 10.1186/s12874-019-0868-8 (PMC6896692; doi:10.1186/s12874-019-0868-8)
Supplement: Supplementary file 1 — Additional file 1. A. Questionnaire instruments. B. Cost estimate calculations. C. Field study participation. D. Figures. [file 12874_2019_868_MOESM1_ESM.pdf]

# Effectiveness of incentives and follow-up on increasing survey response rates and participation in field studies

## Supplementary Online Materials

**Authors and affiliations** Michael G. Smith<sup>1\*</sup>, Maryam Witte<sup>1</sup>, Sarah Rocha<sup>1</sup> and Mathias Basner<sup>1</sup>

<sup>1</sup> Unit for Experimental Psychiatry, Division of Sleep and Chronobiology, University of Pennsylvania Perelman School of Medicine, Philadelphia, PA, USA

\*Corresponding author: Michael G. Smith

[Michael.smith@pennmedicine.upenn.edu](mailto:Michael.smith@pennmedicine.upenn.edu)

Unit for Experimental Psychiatry, Division of Sleep and Chronobiology, University of Pennsylvania Perelman School of Medicine, 1020 Blockley Hall, 423 Guardian Drive

This supplement provides ancillary methods and results to the main text:

### A. Questionnaire instruments

Complete versions of the short, medium and long questionnaires are given on p. 2, pp. 3-4 and pp. 5-8 respectively.

### B. Cost estimate calculations

Formulae used to estimate the costs to receive one completed survey and to recruit one participant into the field study are given on p. 9.

### C. Field study participation

Results of the regression models for the odds of a mailed individual eventually participating in the field study are given in Table S1 (p. 10). Data are visualized for each predictor variable in Figure S1 (p. 11).

### D. Figures

Figure S1 (p. 11) presents the odds ratios of completing the survey, interest in the field study and participating in the field study. Results are given for each independent predictor variable in the fully adjusted regression models: Model 2 for survey completion and Model 3 for interest and participation in the field study. The presented results are from Table 2 and Table 3 in the main article, and Table S1 in this Supplemental Material (p. 10).

## Short questionnaire

**Q1.** During the **past month**, how would you rate your sleep quality overall?

|                          |                          |                          |                          |
|--------------------------|--------------------------|--------------------------|--------------------------|
| <b>Very Good</b>         | <b>Fairly Good</b>       | <b>Fairly Bad</b>        | <b>Very Bad</b>          |
| ▼                        | ▼                        | ▼                        | ▼                        |
| <input type="checkbox"/> | <input type="checkbox"/> | <input type="checkbox"/> | <input type="checkbox"/> |

**Q2.** In general, would you say your health is...?

|                          |                          |                          |                          |                          |
|--------------------------|--------------------------|--------------------------|--------------------------|--------------------------|
| <b>Poor</b>              | <b>Fair</b>              | <b>Good</b>              | <b>Very Good</b>         | <b>Excellent</b>         |
| ▼                        | ▼                        | ▼                        | ▼                        | ▼                        |
| <input type="checkbox"/> |

**Q3.** Rate how strongly you agree or disagree to the statement: I am sensitive to noise

|                          |                          |                          |                          |                          |                          |
|--------------------------|--------------------------|--------------------------|--------------------------|--------------------------|--------------------------|
| <b>Strongly Disagree</b> |                          |                          |                          |                          | <b>Strongly Agree</b>    |
| <b>1</b>                 | <b>2</b>                 | <b>3</b>                 | <b>4</b>                 | <b>5</b>                 | <b>6</b>                 |
| ▼                        | ▼                        | ▼                        | ▼                        | ▼                        | ▼                        |
| <input type="checkbox"/> |

**Q4.** Thinking about the **last 12 months** or so, when you were here at home, how much was your sleep disturbed by noise from the following sources?

|                          | <b>Not at all</b>        | <b>Slightly</b>          | <b>Moderately</b>        | <b>Very</b>              | <b>Extremely</b>         |
|--------------------------|--------------------------|--------------------------|--------------------------|--------------------------|--------------------------|
|                          | ▼                        | ▼                        | ▼                        | ▼                        | ▼                        |
| <b>Q4a.</b> Road Traffic | <input type="checkbox"/> |
| <b>Q4b.</b> Trains       | <input type="checkbox"/> |
| <b>Q4c.</b> Aircraft     | <input type="checkbox"/> |
| <b>Q4d.</b> Neighbors    | <input type="checkbox"/> |

**Q5.** Are you Hispanic or Latino? ☐ Yes ☐ No ☐ Prefer Not to Answer

**Q6.** What race do you consider yourself to be? (mark all that apply)

|                                                           |                                                                    |
|-----------------------------------------------------------|--------------------------------------------------------------------|
| <input type="checkbox"/> American Indian or Alaska Native | <input type="checkbox"/> Native Hawaiian or Other Pacific Islander |
| <input type="checkbox"/> Asian                            | <input type="checkbox"/> White                                     |
| <input type="checkbox"/> Black or African American        | <input type="checkbox"/> Other (please specify): _____             |
| <input type="checkbox"/> Prefer Not to Answer             |                                                                    |

|                                                                                  |                              |
|----------------------------------------------------------------------------------|------------------------------|
| <b>Q7. Gender:</b> <input type="checkbox"/> Male <input type="checkbox"/> Female | <b>Q8. Age:</b> _____(years) |
|----------------------------------------------------------------------------------|------------------------------|

## Medium questionnaire

|                                                                                          |                          |                          |                          |  |
|------------------------------------------------------------------------------------------|--------------------------|--------------------------|--------------------------|--|
| <b>Q1.</b> During the <b>past month</b> , how would you rate your sleep quality overall? |                          |                          |                          |  |
| <b>Very Good</b>                                                                         | <b>Fairly Good</b>       | <b>Fairly Bad</b>        | <b>Very Bad</b>          |  |
| ▼                                                                                        | ▼                        | ▼                        | ▼                        |  |
| <input type="checkbox"/>                                                                 | <input type="checkbox"/> | <input type="checkbox"/> | <input type="checkbox"/> |  |

  

|                                                                                                                                   |                              |                             |                                   |  |
|-----------------------------------------------------------------------------------------------------------------------------------|------------------------------|-----------------------------|-----------------------------------|--|
| <b>Q2.</b> How often have you have taken medicine (prescribed or “over the counter”) to help you sleep in the <b>past month</b> ? |                              |                             |                                   |  |
| <b>Not during the past month</b>                                                                                                  | <b>Less than once a week</b> | <b>Once or twice a week</b> | <b>Three or more times a week</b> |  |
| ▼                                                                                                                                 | ▼                            | ▼                           | ▼                                 |  |
| <input type="checkbox"/>                                                                                                          | <input type="checkbox"/>     | <input type="checkbox"/>    | <input type="checkbox"/>          |  |

  

|                                                                                                                          |                          |                          |                          |                          |                          |
|--------------------------------------------------------------------------------------------------------------------------|--------------------------|--------------------------|--------------------------|--------------------------|--------------------------|
| <b>Q3.</b> How often in the <b>past month</b> have you done the following because of noise when trying to sleep at home? |                          |                          |                          |                          |                          |
|                                                                                                                          | <b>Never</b>             | <b>Rarely</b>            | <b>Sometimes</b>         | <b>Often</b>             | <b>Always</b>            |
|                                                                                                                          | 1                        | 2                        | 3                        | 4                        | 5                        |
|                                                                                                                          | ▼                        | ▼                        | ▼                        | ▼                        | ▼                        |
| <b>Q3a.</b> Wear earplugs or headphones                                                                                  | <input type="checkbox"/> |
| <b>Q3b.</b> Turn on the TV                                                                                               | <input type="checkbox"/> |
| <b>Q3c.</b> Turn on music                                                                                                | <input type="checkbox"/> |
| <b>Q3d.</b> Close windows                                                                                                | <input type="checkbox"/> |
| <b>Q3e.</b> Use a sound machine                                                                                          | <input type="checkbox"/> |
| <b>Q3f.</b> Turn on a fan                                                                                                | <input type="checkbox"/> |

  

|                                                                                              |                          |                          |                          |                          |                          |
|----------------------------------------------------------------------------------------------|--------------------------|--------------------------|--------------------------|--------------------------|--------------------------|
| <b>Q4.</b> Rate how strongly you agree or disagree to the statement: I am sensitive to noise |                          |                          |                          |                          |                          |
| <b>Strongly Disagree</b>                                                                     |                          |                          |                          |                          | <b>Strongly Agree</b>    |
| 1                                                                                            | 2                        | 3                        | 4                        | 5                        | 6                        |
| ▼                                                                                            | ▼                        | ▼                        | ▼                        | ▼                        | ▼                        |
| <input type="checkbox"/>                                                                     | <input type="checkbox"/> | <input type="checkbox"/> | <input type="checkbox"/> | <input type="checkbox"/> | <input type="checkbox"/> |

  

|                                                                                                                                                               |                          |                          |                          |                          |                          |
|---------------------------------------------------------------------------------------------------------------------------------------------------------------|--------------------------|--------------------------|--------------------------|--------------------------|--------------------------|
| <b>Q5.</b> Thinking about the <b>last 12 months</b> or so, when you were here at home, how much was your sleep disturbed by noise from the following sources? |                          |                          |                          |                          |                          |
|                                                                                                                                                               | <b>Not at all</b>        | <b>Slightly</b>          | <b>Moderately</b>        | <b>Very</b>              | <b>Extremely</b>         |
|                                                                                                                                                               | ▼                        | ▼                        | ▼                        | ▼                        | ▼                        |
| <b>Q5a.</b> Road Traffic                                                                                                                                      | <input type="checkbox"/> |
| <b>Q5b.</b> Trains                                                                                                                                            | <input type="checkbox"/> |
| <b>Q5c.</b> Aircraft                                                                                                                                          | <input type="checkbox"/> |
| <b>Q5d.</b> Neighbors                                                                                                                                         | <input type="checkbox"/> |

  

|                                                         |                          |                          |                          |                          |
|---------------------------------------------------------|--------------------------|--------------------------|--------------------------|--------------------------|
| <b>Q6.</b> In general, would you say your health is...? |                          |                          |                          |                          |
| <b>Poor</b>                                             | <b>Fair</b>              | <b>Good</b>              | <b>Very Good</b>         | <b>Excellent</b>         |
| ▼                                                       | ▼                        | ▼                        | ▼                        | ▼                        |
| <input type="checkbox"/>                                | <input type="checkbox"/> | <input type="checkbox"/> | <input type="checkbox"/> | <input type="checkbox"/> |

**Q7.** Have you ever been diagnosed by a health professional with any of the following sleep disorders?

- |                                                          |                                     |                                                |
|----------------------------------------------------------|-------------------------------------|------------------------------------------------|
| <input type="checkbox"/> Sleep Apnea                     | <input type="checkbox"/> Narcolepsy | <input type="checkbox"/> Restless Leg Syndrome |
| <input type="checkbox"/> Periodic Limb Movement Syndrome | <input type="checkbox"/> Insomnia   | <input type="checkbox"/> None                  |
| <input type="checkbox"/> Other (please specify): _____   |                                     |                                                |

**Q8.** Do you have any problems or difficulties with your sense of hearing?

☐ Yes ☐ No

**Q9.** Have you ever been diagnosed by a health professional with the following conditions (mark all that apply)?

- |                                                               |                                                             |                               |
|---------------------------------------------------------------|-------------------------------------------------------------|-------------------------------|
| <input type="checkbox"/> Hypertension/<br>High blood pressure | <input type="checkbox"/> Arrhythmia/<br>Irregular heartbeat | <input type="checkbox"/> None |
|---------------------------------------------------------------|-------------------------------------------------------------|-------------------------------|

**Q10.** If currently employed, does your job require overnight shift work?

(Overnight shift work refers to work for at least 4 hours between 12 a.m. midnight to 6 a.m. in the morning)

☐ Yes ☐ No

**Q11.** How long have you lived at your current residence

**Less than 1 year**

**1-5 years**

**5-10 years**

**More than 10 years**

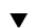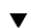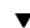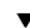

☐

☐

☐

☐

**Q12.** Are there children in this household under the age of 5?

☐ Yes ☐ No

**Q13.** Are you Hispanic or Latino?

☐ Yes ☐ No ☐ Prefer Not to Answer

**Q14** What race do you consider yourself to be? (mark all that apply)

- |                                                           |                                                                    |
|-----------------------------------------------------------|--------------------------------------------------------------------|
| <input type="checkbox"/> American Indian or Alaska Native | <input type="checkbox"/> Native Hawaiian or Other Pacific Islander |
| <input type="checkbox"/> Asian                            | <input type="checkbox"/> White                                     |
| <input type="checkbox"/> Black or African American        | <input type="checkbox"/> Other (please specify): _____             |
| <input type="checkbox"/> Prefer Not to Answer             |                                                                    |

**Q15.** Gender:

☐ Male ☐ Female

**Q16.** Age:

\_\_\_\_\_(years)

**Q17.** What is your height?

\_\_\_\_\_feet\_\_\_\_\_inches

**Q18.** What is your weight?

\_\_\_\_\_lbs

## Long questionnaire

|                                                                                                               |                     |
|---------------------------------------------------------------------------------------------------------------|---------------------|
| <b>Q1a.</b> During the <b>past month</b> , at what time have you usually gone to bed on weekdays or workdays? | _____ (HH:MM AM/PM) |
| <b>Q1b.</b> During the <b>past month</b> , at what time have you usually woken up on weekdays or workdays?    | _____ (HH:MM AM/PM) |
| <b>Q1c.</b> During the <b>past month</b> , how much sleep did you usually get on weekdays or workdays?        | _____ (Hours)       |

|                                                                                          |                          |                          |                          |
|------------------------------------------------------------------------------------------|--------------------------|--------------------------|--------------------------|
| <b>Q2.</b> During the <b>past month</b> , how would you rate your sleep quality overall? |                          |                          |                          |
| <b>Very Good</b>                                                                         | <b>Fairly Good</b>       | <b>Fairly Bad</b>        | <b>Very Bad</b>          |
| ▼                                                                                        | ▼                        | ▼                        | ▼                        |
| <input type="checkbox"/>                                                                 | <input type="checkbox"/> | <input type="checkbox"/> | <input type="checkbox"/> |

|                                                                                                                                                |                                  |                              |                             |                                   |
|------------------------------------------------------------------------------------------------------------------------------------------------|----------------------------------|------------------------------|-----------------------------|-----------------------------------|
| <b>Q3.</b> For the following questions, select the response that best reflects how often the following occurred during the <b>past month</b> . | <b>Not during the past month</b> | <b>Less than once a week</b> | <b>Once or twice a week</b> | <b>Three or more times a week</b> |
|                                                                                                                                                | ▼                                | ▼                            | ▼                           | ▼                                 |
| <b>Q3a.</b> You had trouble sleeping because you cannot get to sleep within <b>30 minutes</b> ?                                                | <input type="checkbox"/>         | <input type="checkbox"/>     | <input type="checkbox"/>    | <input type="checkbox"/>          |
| <b>Q3b.</b> You had trouble sleeping because you wake up in the middle of the night or early morning?                                          | <input type="checkbox"/>         | <input type="checkbox"/>     | <input type="checkbox"/>    | <input type="checkbox"/>          |
| <b>Q3c.</b> You have taken medicine (prescribed or "over the counter") to help you sleep?                                                      | <input type="checkbox"/>         | <input type="checkbox"/>     | <input type="checkbox"/>    | <input type="checkbox"/>          |
| <b>Q3d.</b> You had trouble staying awake while driving, eating meals, or engaging in social activity?                                         | <input type="checkbox"/>         | <input type="checkbox"/>     | <input type="checkbox"/>    | <input type="checkbox"/>          |

|                                                                                                                          |                          |                          |                          |                          |                          |
|--------------------------------------------------------------------------------------------------------------------------|--------------------------|--------------------------|--------------------------|--------------------------|--------------------------|
| <b>Q4.</b> How often in the <b>past month</b> have you done the following because of noise when trying to sleep at home? | <b>Never</b>             | <b>Rarely</b>            | <b>Sometimes</b>         | <b>Often</b>             | <b>Always</b>            |
|                                                                                                                          | 1                        | 2                        | 3                        | 4                        | 5                        |
|                                                                                                                          | ▼                        | ▼                        | ▼                        | ▼                        | ▼                        |
| <b>Q4a.</b> Wear earplugs or headphones                                                                                  | <input type="checkbox"/> |
| <b>Q4b.</b> Use alcohol                                                                                                  | <input type="checkbox"/> |
| <b>Q4c.</b> Use medication                                                                                               | <input type="checkbox"/> |
| <b>Q4d.</b> Turn on the TV                                                                                               | <input type="checkbox"/> |
| <b>Q4e.</b> Turn on music                                                                                                | <input type="checkbox"/> |
| <b>Q4f.</b> Close windows                                                                                                | <input type="checkbox"/> |
| <b>Q4g.</b> Use a sound machine                                                                                          | <input type="checkbox"/> |
| <b>Q4h.</b> Turn on a fan                                                                                                | <input type="checkbox"/> |

| Q5. For the following statements respond how strongly you agree or disagree.                   |                             |                          |                          |                          |                          |                          |
|------------------------------------------------------------------------------------------------|-----------------------------|--------------------------|--------------------------|--------------------------|--------------------------|--------------------------|
|                                                                                                | Strongly Disagree<br>1<br>▼ | 2<br>▼                   | 3<br>▼                   | 4<br>▼                   | 5<br>▼                   | Strongly Agree<br>6<br>▼ |
| Q5a. I am easily awakened by noise                                                             | <input type="checkbox"/>    | <input type="checkbox"/> | <input type="checkbox"/> | <input type="checkbox"/> | <input type="checkbox"/> | <input type="checkbox"/> |
| Q5b. I get used to most noises without much difficulty                                         | <input type="checkbox"/>    | <input type="checkbox"/> | <input type="checkbox"/> | <input type="checkbox"/> | <input type="checkbox"/> | <input type="checkbox"/> |
| Q5c. I find it hard to relax in a place that is noisy                                          | <input type="checkbox"/>    | <input type="checkbox"/> | <input type="checkbox"/> | <input type="checkbox"/> | <input type="checkbox"/> | <input type="checkbox"/> |
| Q5d. I am good at concentrating no matter what is going on around me                           | <input type="checkbox"/>    | <input type="checkbox"/> | <input type="checkbox"/> | <input type="checkbox"/> | <input type="checkbox"/> | <input type="checkbox"/> |
| Q5e. I get mad at people who make noise that keeps me from falling asleep or getting work done | <input type="checkbox"/>    | <input type="checkbox"/> | <input type="checkbox"/> | <input type="checkbox"/> | <input type="checkbox"/> | <input type="checkbox"/> |
| Q5f. I am sensitive to noise                                                                   | <input type="checkbox"/>    | <input type="checkbox"/> | <input type="checkbox"/> | <input type="checkbox"/> | <input type="checkbox"/> | <input type="checkbox"/> |

| Q6. Thinking about the last 12 months or so, when you were here at home, how much was your sleep disturbed by noise from the following sources? |                          |                          |                          |                          |                          |
|-------------------------------------------------------------------------------------------------------------------------------------------------|--------------------------|--------------------------|--------------------------|--------------------------|--------------------------|
|                                                                                                                                                 | Not at all<br>▼          | Slightly<br>▼            | Moderately<br>▼          | Very<br>▼                | Extremely<br>▼           |
| Q6a. Road Traffic                                                                                                                               | <input type="checkbox"/> |
| Q6b. Trains                                                                                                                                     | <input type="checkbox"/> |
| Q6c. Aircraft                                                                                                                                   | <input type="checkbox"/> |
| Q6d. Industries/Factories                                                                                                                       | <input type="checkbox"/> |
| Q6e. Construction                                                                                                                               | <input type="checkbox"/> |
| Q6f. Neighbors                                                                                                                                  | <input type="checkbox"/> |
| Q6g. Air Conditioner                                                                                                                            | <input type="checkbox"/> |

| Q7. Thinking about the last 12 months or so, when you are here at home, how much does noise from each of the following bother, disturb, or annoy you? |                          |                          |                          |                          |                          |
|-------------------------------------------------------------------------------------------------------------------------------------------------------|--------------------------|--------------------------|--------------------------|--------------------------|--------------------------|
|                                                                                                                                                       | Not at all<br>▼          | Slightly<br>▼            | Moderately<br>▼          | Very<br>▼                | Extremely<br>▼           |
| Q7a. Road Traffic                                                                                                                                     | <input type="checkbox"/> |
| Q7b. Trains                                                                                                                                           | <input type="checkbox"/> |
| Q7c. Aircraft                                                                                                                                         | <input type="checkbox"/> |
| Q7d. Industries/Factories                                                                                                                             | <input type="checkbox"/> |
| Q7e. Construction                                                                                                                                     | <input type="checkbox"/> |
| Q7f. Neighbors                                                                                                                                        | <input type="checkbox"/> |
| Q7g. Air Conditioner                                                                                                                                  | <input type="checkbox"/> |

| Q8. In general, would you say your health is...? |                          |                          |                          |                          |
|--------------------------------------------------|--------------------------|--------------------------|--------------------------|--------------------------|
| Poor<br>▼                                        | Fair<br>▼                | Good<br>▼                | Very Good<br>▼           | Excellent<br>▼           |
| <input type="checkbox"/>                         | <input type="checkbox"/> | <input type="checkbox"/> | <input type="checkbox"/> | <input type="checkbox"/> |

|                                                                                                             |                                     |                                                |
|-------------------------------------------------------------------------------------------------------------|-------------------------------------|------------------------------------------------|
| <b>Q9. Have you ever been diagnosed by a health professional with any of the following sleep disorders?</b> |                                     |                                                |
| <input type="checkbox"/> Sleep Apnea                                                                        | <input type="checkbox"/> Narcolepsy | <input type="checkbox"/> Restless Leg Syndrome |
| <input type="checkbox"/> Periodic Limb Movement Syndrome                                                    | <input type="checkbox"/> Insomnia   | <input type="checkbox"/> None                  |
| <input type="checkbox"/> Other (please specify): _____                                                      |                                     |                                                |

  

|                                                                                  |                                                          |
|----------------------------------------------------------------------------------|----------------------------------------------------------|
| <b>Q10. Do you have any problems or difficulties with your sense of hearing?</b> | <input type="checkbox"/> Yes <input type="checkbox"/> No |
|----------------------------------------------------------------------------------|----------------------------------------------------------|

  

|                                                                                                                         |                                                                                                                                               |
|-------------------------------------------------------------------------------------------------------------------------|-----------------------------------------------------------------------------------------------------------------------------------------------|
| <b>Q11a. Have you ever been diagnosed by a health professional with the following conditions (mark all that apply)?</b> | <b>Q11b. If you have been diagnosed with a condition listed under Q11a, have you been treated for the condition in the <b>past month</b>?</b> |
| <input type="checkbox"/> Hypertension/High blood pressure                                                               | <input type="checkbox"/> Yes <input type="checkbox"/> No                                                                                      |
| <input type="checkbox"/> Chronic headaches/Migraines                                                                    | <input type="checkbox"/> Yes <input type="checkbox"/> No                                                                                      |
| <input type="checkbox"/> Arrhythmia/Irregular heartbeat                                                                 | <input type="checkbox"/> Yes <input type="checkbox"/> No                                                                                      |
| <input type="checkbox"/> Heart disease                                                                                  | <input type="checkbox"/> Yes <input type="checkbox"/> No                                                                                      |
| <input type="checkbox"/> Stomach ulcer                                                                                  | <input type="checkbox"/> Yes <input type="checkbox"/> No                                                                                      |
| <input type="checkbox"/> Diabetes                                                                                       | <input type="checkbox"/> Yes <input type="checkbox"/> No                                                                                      |
| <input type="checkbox"/> None of the above                                                                              |                                                                                                                                               |

  

|                                                                                                                                                                                                                                  |                                                                                                                                                                                                                                                                                                                        |
|----------------------------------------------------------------------------------------------------------------------------------------------------------------------------------------------------------------------------------|------------------------------------------------------------------------------------------------------------------------------------------------------------------------------------------------------------------------------------------------------------------------------------------------------------------------|
| <b>Q12. What is your marital status?</b>                                                                                                                                                                                         | <b>Q13. What was your total household income last year?</b>                                                                                                                                                                                                                                                            |
| <input type="checkbox"/> Single<br><input type="checkbox"/> Married<br><input type="checkbox"/> Widowed<br><input type="checkbox"/> Separated<br><input type="checkbox"/> Divorced<br><input type="checkbox"/> Domestic Partners | <input type="checkbox"/> < \$25,000<br><input type="checkbox"/> \$25,000-\$50,000<br><input type="checkbox"/> \$50,000-\$75,000<br><input type="checkbox"/> \$75,000-\$100,000<br><input type="checkbox"/> \$100,000-\$150,000<br><input type="checkbox"/> >\$150,000<br><input type="checkbox"/> Prefer Not to Answer |

  

|                                                                                                                                                        |                                                                                                                                                                                       |
|--------------------------------------------------------------------------------------------------------------------------------------------------------|---------------------------------------------------------------------------------------------------------------------------------------------------------------------------------------|
| <b>Q14. What is the highest level of education you have completed?</b>                                                                                 | <b>Q15. What is your current employment status?</b>                                                                                                                                   |
| <input type="checkbox"/> Less than High School<br><input type="checkbox"/> High School Graduate<br><input type="checkbox"/> College Graduate or Higher | <input type="checkbox"/> Working<br><input type="checkbox"/> Unemployed<br><input type="checkbox"/> Student<br><input type="checkbox"/> Retired<br><input type="checkbox"/> Homemaker |

  

|                                                                                                          |                                                          |
|----------------------------------------------------------------------------------------------------------|----------------------------------------------------------|
| <b>Q16. If currently employed, does your job require overnight shift work?</b>                           |                                                          |
| (Overnight shift work refers to work for at least 4 hours between 12 am midnight to 6 am in the morning) | <input type="checkbox"/> Yes <input type="checkbox"/> No |

  

|                                         |                                                                                                        |
|-----------------------------------------|--------------------------------------------------------------------------------------------------------|
| <b>Q17. Are you Hispanic or Latino?</b> | <input type="checkbox"/> Yes <input type="checkbox"/> No <input type="checkbox"/> Prefer Not to Answer |
|-----------------------------------------|--------------------------------------------------------------------------------------------------------|

**Q18.** What race do you consider yourself to be? (mark all that apply)

- |                                                           |                                                                    |
|-----------------------------------------------------------|--------------------------------------------------------------------|
| <input type="checkbox"/> American Indian or Alaska Native | <input type="checkbox"/> Native Hawaiian or Other Pacific Islander |
| <input type="checkbox"/> Asian                            | <input type="checkbox"/> White                                     |
| <input type="checkbox"/> Black or African American        | <input type="checkbox"/> Other (please specify): _____             |
| <input type="checkbox"/> Prefer Not to Answer             |                                                                    |

**Q19.** Has your current residence received any sound proofing treatment to reduce noise?

☐ Yes ☐ No

**Q20.** How long have you lived at your current residence?

- ☐ Less than 1 year  
☐ 1-5 years  
☐ 5-10 years  
☐ More than 10 years

**Q21.** Do you have an air conditioner in your bedroom?

- ☐ No Unit  
☐ Central Air Conditioner  
☐ Window Unit

**Q22.** How many people (including yourself) reside in this household?

\_\_\_\_\_

**Q23.** How many children in this household are under the age of 5?

\_\_\_\_\_

**Q24. Gender:** ☐ Male ☐ Female

**Q25. Age:** \_\_\_\_\_(years)

**Q26.** What is your height? \_\_\_\_\_feet\_\_\_\_\_inches

**Q27.** What is your weight? \_\_\_\_\_lbs

## Cost estimate calculations

$$\#nondeliverable\ surveys = \frac{(nondelivery\ rate)}{delivery\ rate} \times \#surveys\ delivered$$

where *#surveys delivered* is the number of surveys that must be delivered in order to receive one response to the postal survey (Table 6 in main manuscript).

$$reclaimed\ cash\ incentives = \#nondelilverable\ surveys \times \$2$$

$$\begin{aligned} cost\ estimate, 1\ response \\ &= (\#surveys\ delivered \times cost\ of\ single\ mailing) \\ &+ (\#nondeliverable\ surveys \times cost\ of\ single\ mailing) \\ &- reclaimed\ cash\ incentives \end{aligned}$$

$$\begin{aligned} cost\ estimate, 1\ participant \\ &= cost\ estimate, 1\ response \times 1/field\ study\ participation\ rate \end{aligned}$$

The following example is for short surveys using a \$2 cash incentive and 3 follow-up waves:

Delivery rate = 87.6%; #surveys delivered = 4.61

$$\#nondeliverable\ surveys = \frac{(1 - 0.876)}{0.876} \times 4.61 = 0.65$$

$$reclaimed\ cash\ incentives = 0.65 \times \$2 = 1.3$$

A complete mailing round costs \$5.74:

$$cost\ estimate, 1\ response = (4.61 \times 5.74) + (0.65 \times 5.74) - 1.3 = \mathbf{\$28.89}$$

Field study participation rate = 9.1%;

$$cost\ estimate, 1\ participant = 28.89 \times 1/0.091 = \mathbf{\$317.47}$$

The \$0.04 difference between this cost estimate for one participant and the cost estimate in Table 6 is due to rounding of the values in the above calculation. The cost estimates in Table 6 are calculated using non-rounded data.

Table S1 Results of the regression models for recipients participating in the field study (including only completed surveys). All analyses excluded surveys that could not be delivered for any reason. df=Degrees of Freedom. OR=Odds Ratio. CI=Confidence Interval. Ref=Reference category.

| Model and test relative to intercept-only model    | Variable                | Fixed effects |               |       | Variable level | Field study participation |       |              |
|----------------------------------------------------|-------------------------|---------------|---------------|-------|----------------|---------------------------|-------|--------------|
|                                                    |                         | df            | Wald $\chi^2$ | p     |                | p-value                   | OR    | 95% CI       |
| Model 1<br>$\chi^2(6, n=407)=4.707$ ,<br>p=0.582   | Survey incentive        | 1             | 0.174         | 0.677 | Gift card      | Ref                       |       |              |
|                                                    |                         |               |               |       | \$2            | 0.677                     | 0.608 | 0.059-6.305  |
|                                                    | Survey length           | 2             | 0.058         | 0.971 | Short          | Ref                       |       |              |
|                                                    |                         |               |               |       | Medium         | 0.809                     | 0.855 | 0.241-3.040  |
|                                                    |                         |               |               |       | Long           | 0.896                     | 0.929 | 0.307-2.811  |
|                                                    | Follow-up waves         | 2             | 0.805         | 0.669 | 0              | Ref                       |       |              |
|                                                    |                         |               |               |       | 2              | 0.698                     | 1.528 | 0.179-13.022 |
|                                                    |                         |               |               |       | 3              | 0.936                     | 0.914 | 0.100-8.300  |
|                                                    | Field study incentive   | 1             | 2.828         | 0.093 | 150            | Ref                       |       |              |
|                                                    |                         |               |               |       | 200            | 0.093                     | 0.376 | 0.120-1.176  |
| Model 2<br>$\chi^2(9, n=407)=10.502$ ,<br>p=0.486  | Survey incentive        | 1             | 0.294         | 0.588 | Gift card      | Ref                       |       |              |
|                                                    |                         |               |               |       | \$2            | 0.588                     | 0.521 | 0.049-5.505  |
|                                                    | Survey length           | 2             | 0.065         | 0.968 | Short          | Ref                       |       |              |
|                                                    |                         |               |               |       | Medium         | 0.810                     | 0.854 | 0.236-3.095  |
|                                                    |                         |               |               |       | Long           | 0.843                     | 0.892 | 0.290-2.748  |
|                                                    | Follow-up waves         | 2             | 1.012         | 0.603 | 0              | Ref                       |       |              |
|                                                    |                         |               |               |       | 2              | 0.628                     | 1.703 | 0.197-14.691 |
|                                                    |                         |               |               |       | 3              | 0.971                     | 0.960 | 0.104-8.834  |
|                                                    | Field study incentive   | 1             | 3.254         | 0.071 | 150            | Ref                       |       |              |
|                                                    |                         |               |               |       | 200            | 0.071                     | 0.346 | 0.109-1.094  |
|                                                    | Noise exposure category | 4             | 3.662         | 0.454 | <40            | Ref                       |       |              |
|                                                    |                         |               |               |       | 40-45          | 0.258                     | 0.519 | 0.166-1.619  |
|                                                    |                         |               |               |       | 45-50          | 0.906                     | 1.061 | 0.399-2.818  |
|                                                    |                         |               |               |       | 50-55          | 0.605                     | 0.770 | 0.285-2.079  |
|                                                    |                         |               |               |       | >55            | 0.142                     | 0.427 | 0.137-1.330  |
|                                                    | Direction               | 1             | 1.917         | 0.166 | West           | Ref                       |       |              |
|                                                    |                         |               |               |       | East           | 0.166                     | 0.607 | 0.299-1.231  |
| Model 3<br>$\chi^2(17, n=364)=13.496$ ,<br>p=0.702 | Survey incentive        | 1             | 0.286         | 0.593 | Gift card      | Ref                       |       |              |
|                                                    |                         |               |               |       | \$2            | 0.593                     | 0.520 | 0.047-5.730  |
|                                                    | Survey length           | 2             | 0.011         | 0.995 | Short          | Ref                       |       |              |
|                                                    |                         |               |               |       | Medium         | 0.919                     | 0.933 | 0.244-3.569  |
|                                                    |                         |               |               |       | Long           | 0.944                     | 0.959 | 0.303-3.036  |
|                                                    | Follow-up waves         | 2             | 1.092         | 0.579 | 0              | Ref                       |       |              |
|                                                    |                         |               |               |       | 2              | 0.642                     | 1.687 | 0.187-15.238 |
|                                                    |                         |               |               |       | 3              | 0.935                     | 0.910 | 0.094-8.817  |
|                                                    | Field study incentive   | 1             | 3.190         | 0.074 | 150            | Ref                       |       |              |
|                                                    |                         |               |               |       | 200            | 0.074                     | 0.344 | 0.107-1.110  |
|                                                    | Noise exposure category | 4             | 3.432         | 0.488 | <40            | Ref                       |       |              |
|                                                    |                         |               |               |       | 40-45          | 0.354                     | 0.570 | 0.173-1.873  |
|                                                    |                         |               |               |       | 45-50          | 0.992                     | 0.995 | 0.360-2.746  |
|                                                    |                         |               |               |       | 50-55          | 0.722                     | 0.828 | 0.293-2.340  |
|                                                    |                         |               |               |       | >55            | 0.119                     | 0.391 | 0.120-1.274  |
|                                                    | Direction               | 1             | 1.877         | 0.171 | West           | Ref                       |       |              |
|                                                    |                         |               |               |       | East           | 0.171                     | 0.602 | 0.291-1.245  |
|                                                    | Sex                     | 1             | 0.081         | 0.776 | Female         | Ref                       |       |              |
|                                                    |                         |               |               |       | Male           | 0.776                     | 0.894 | 0.411-1.942  |
|                                                    | Age category            | 5             | 3.223         | 0.666 | <30            | Ref                       |       |              |
|                                                    |                         |               |               |       | 30-39          | 0.906                     | 1.096 | 0.237-5.064  |
|                                                    |                         |               |               |       | 40-49          | 0.696                     | 0.737 | 0.159-3.410  |
|                                                    |                         |               |               |       | 50-59          | 0.624                     | 0.686 | 0.152-3.093  |
|                                                    |                         |               |               |       | 60-69          | 0.722                     | 0.764 | 0.173-3.368  |
|                                                    |                         |               |               |       | $\geq 70$      | 0.173                     | 0.263 | 0.039-1.793  |

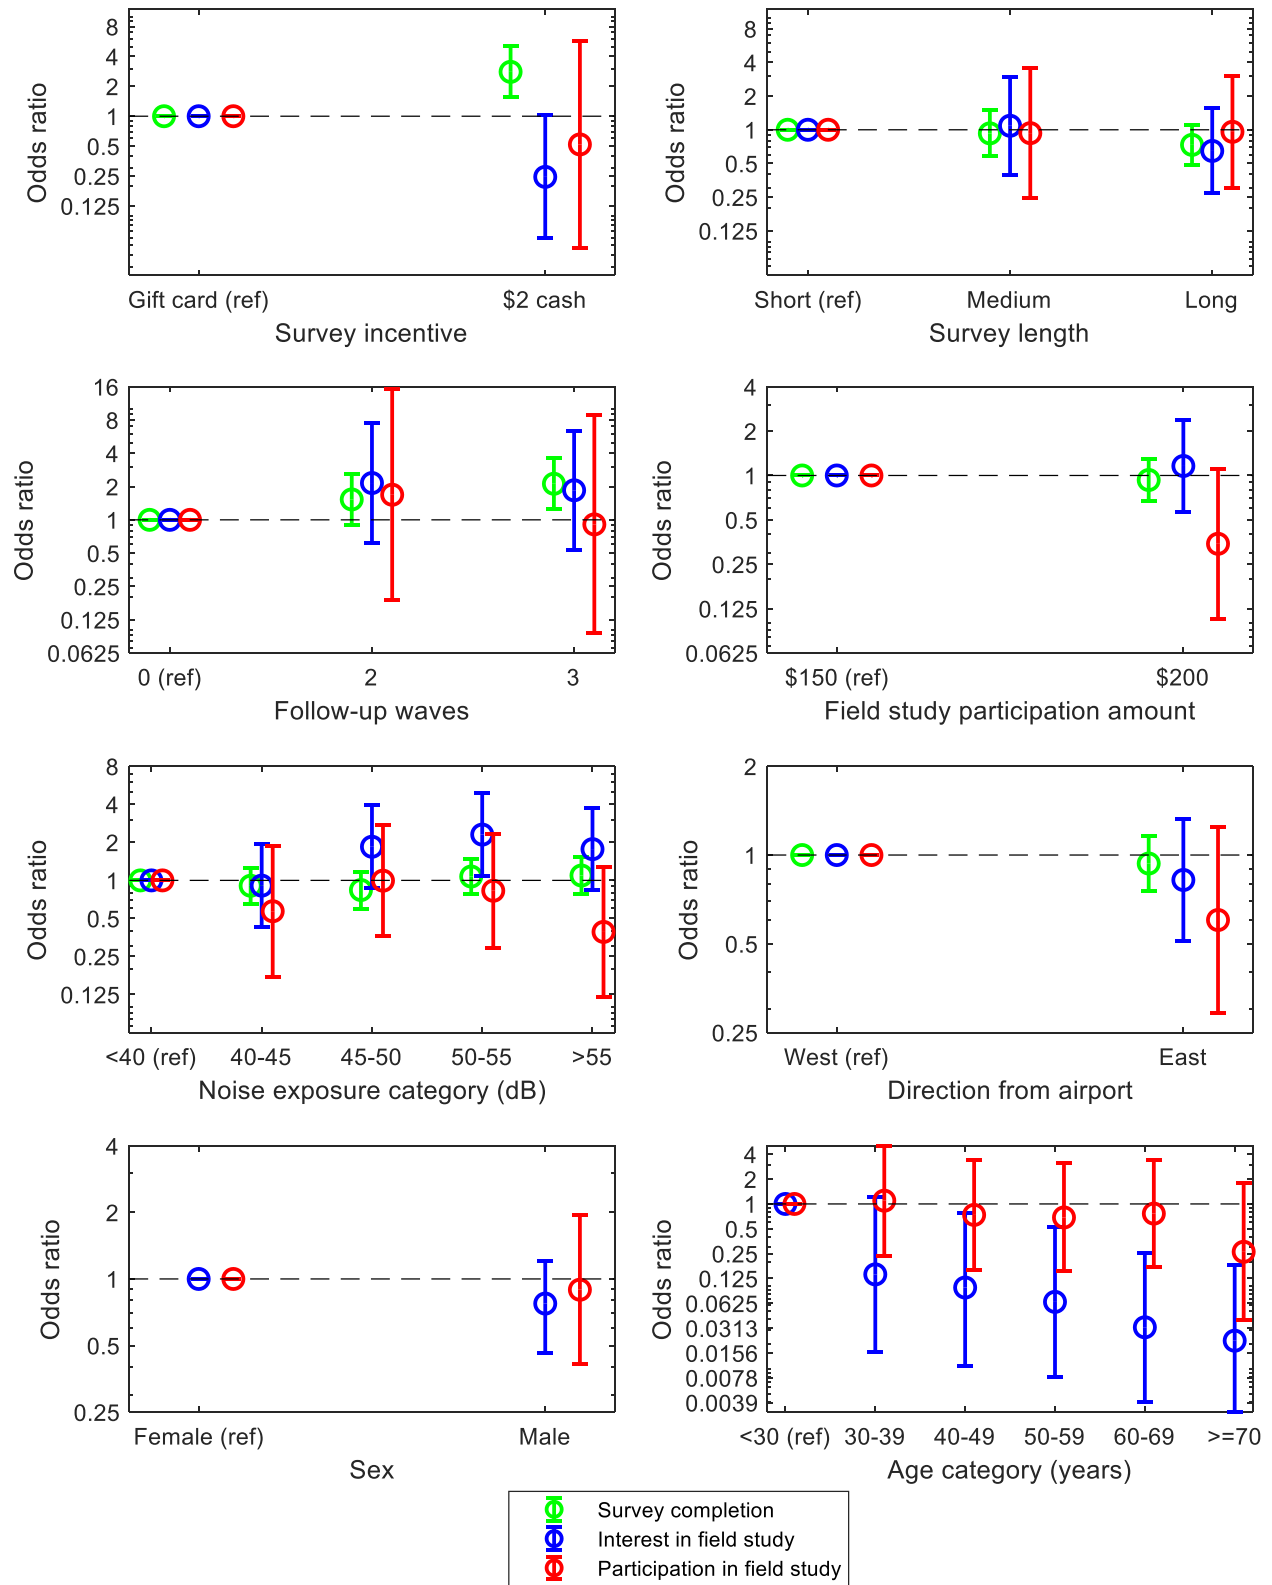

Figure S1 Odds ratios and 95% confidence intervals for the effect of different survey approaches and situational factors on receiving completed surveys (green), eliciting interest in the study (blue) and recruiting a participant into the study (red). The horizontal dashed line indicates the reference value OR=1.0.
